# Supplementary material
Source: PubMed Central journal article supplement (PMC6310653)
Supplement: NIHMS986842-supplement-Supp_figS1to5.pdf [file NIHMS986842-supplement-Supp_figS1to5.pdf]

**Supplemental information: Manganese causes neurotoxic iron accumulation via translational repression of Amyloid Precursor Protein (APP) and H-Ferritin**

**Vivek Venkataramani<sup>1,2\*</sup>, Thorsten R. Doeppner<sup>3</sup>, Desiree Wilkommen<sup>10</sup>, Catherine M. Cahill<sup>6</sup>, Yong-juan Xin<sup>4,5</sup>, Guilin Ye<sup>4,5</sup>, Yanyan Liu<sup>6</sup>, Adam Southon<sup>7</sup>, Allegra Aron<sup>9</sup>, Ho Yu Au-Yeung<sup>11</sup>, Xudong Huang<sup>6</sup>, Debomoy K. Lahiri<sup>8</sup>, Fudi Wang<sup>4,5</sup>, Ashley I. Bush<sup>7</sup>, Gerald G. Wulf<sup>1</sup>, Philipp Ströbel<sup>2</sup>, Bernhard Michalke<sup>10</sup>, Jack T. Rogers<sup>6</sup>**

<sup>1</sup>Department of Hematology and Medical Oncology, <sup>2</sup>Institute of Pathology, <sup>3</sup>Department of Neurology, University Medical Center Göttingen (UMG), Robert-Koch-Str. 40, 37075 Göttingen, Germany; <sup>4</sup>Department of Nutrition, Precision Nutrition Innovation Center, School of Public Health, Zhengzhou University, Zhengzhou 450001; <sup>5</sup>Department of Nutrition, Nutrition Discovery Innovation Center, Institute of Nutrition and Food Safety, School of Public Health, The First Affiliated Hospital, Zhejiang University School of Medicine, Hangzhou 310058, China; <sup>6</sup>Neurochemistry Laboratory, Department of Psychiatry, Massachusetts General Hospital and Harvard Medical School, Charlestown, MA 02129, USA; <sup>7</sup>Melbourne Dementia Research Centre, Florey Institute of Neuroscience and Mental Health, University of Melbourne, 30 Royal Parade, Parkville Vic, Australia 3052; <sup>8</sup>Department of Psychiatry, Indiana Alzheimer Disease Center, Stark Neurosciences Research Institute, Indiana University School of Medicine; <sup>9</sup>Department of Chemistry, University of California, Berkeley, CA 94720, USA; <sup>10</sup>Helmholtz Zentrum München, Deutsches Forschungszentrum für Gesundheit und Umwelt (GmbH), Research Unit Analytical BioGeoChemistry, Ingolstädter Landstr. 1, 85764 Neuherberg; <sup>11</sup>Department of Chemistry, The University of Hong Kong, Pokfulam Road, Hong Kong, P. R. China

**\*Corresponding author:**

Address correspondence and reprint requests to Vivek Venkataramani, MD; Department of Hematology and Oncology and Department of Pathology; University Medical Center Göttingen (UMG), Robert-Koch-Str. 40, 37075 Göttingen, Germany; mail: [ramani@med.uni-goettingen.de](mailto:ramani@med.uni-goettingen.de)

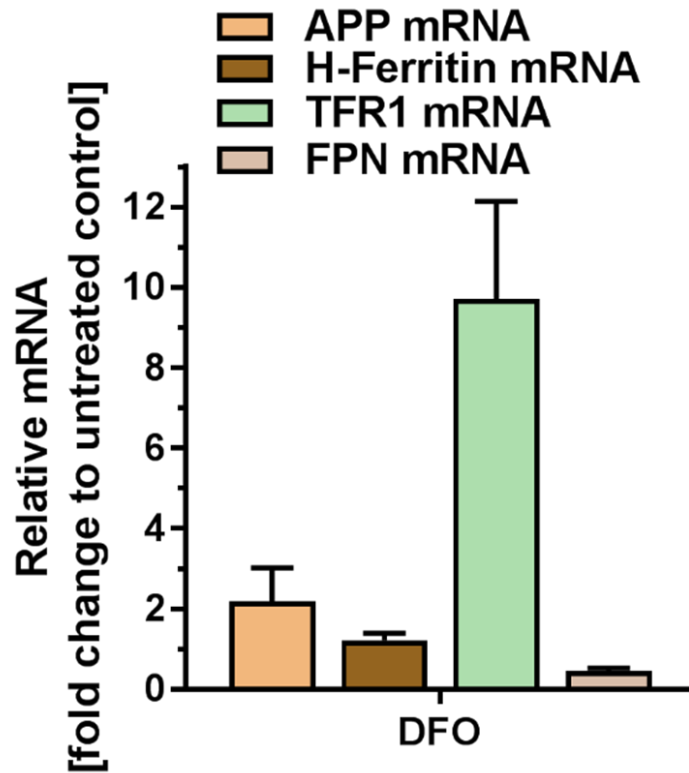

**Supplemental Fig. 1 (corresponding to Fig. 2):** RT-PCR analysis of indicated iron responsive target genes (APP, H-Ferritin, TFR1 and FPN) from SH-SY5Y cells incubated for 24 h with 100  $\mu$ M DFO. All data are normalized to housekeeping gene  $\beta$ -actin and presented as relative fold-induction compared to untreated controls (n=4). N number indicates number of replicates. Data shown represent mean  $\pm$  SD.

|                     |             |                      |              |           |                                  |                 |               |        |     |
|---------------------|-------------|----------------------|--------------|-----------|----------------------------------|-----------------|---------------|--------|-----|
|                     |             | 50                   | 60           | 70        | 80                               | 90              |               |        |     |
| Human APP mRNA (46) | GGGGCCCC    | <b>GGAGACGGCGGC</b>  | GTGGCGG      | CGCGGG    | <b>CAGAGCAAGGACGGCGCGGATC</b>    |                 | (-43)         | AUG    |     |
| Mouse APP mRNA (33) | GGGGCCACC   | <b>GGAGACGGCGGC</b>  | CCGGAC       | GC        | <b>CACAGCCAGGCGCGCGGATC</b>      |                 | (-45)         | AUG    |     |
| Rat APP mRNA (33)   | ACCGGAGAC   | <b>GGCGCGCGCGCGG</b> | CGACGAC      | CGCGGAC   | <b>CACAGTCAGGGTGGCGCGGATC</b>    |                 | (-43)         | AUG    |     |
| Human FPN (99)      | GCTTCCATA   | AAGGCTTTGCCTT        | TCCA         | ACTTCAGCT | <b>CAGTGT</b>                    | TAGCTAAGTTGGAAA | (-94)         | AUG    |     |
| Human L-Fer (3)     | GTTTCGGCGGT | CCCGCGGTCTG          | TCTCTTG      | CTTCAA    | <b>CAGTGT</b>                    | TTGGACGGAA      | <b>CAGATC</b> | (-139) | AUG |
| Human H-Fer (5)     | TCTTCGCCGA  | <b>GAGTCGTCGGG</b>   | TTTCTG       | CTTCAA    | <b>CAGTGT</b>                    | TTGGACGGAA      | <b>CCGGC</b>  | (-149) | AUG |
| Consensus           |             |                      | G-----G----- | C-----    | CA--GN--G---                     | G---C---C       |               |        |     |
|                     |             |                      |              |           | *                                | **              | **            | *      |     |
| Conserved C         | +76         |                      |              | 82-87     | Loop (wrt human APP mRNA)        |                 |               |        |     |
|                     | +33         |                      |              | 39-44     | Loop (wrt human L-Ferritin mRNA) |                 |               |        |     |

**Supplemental Fig. 2 (corresponding to Fig. 3):** Bioinformatics alignment of the 5'untranslated regions of APP mRNAs when aligned to the ferritin canonical IREs AGU and AGA tri-loops as a potential IRP 1 binding site (bold lettering).

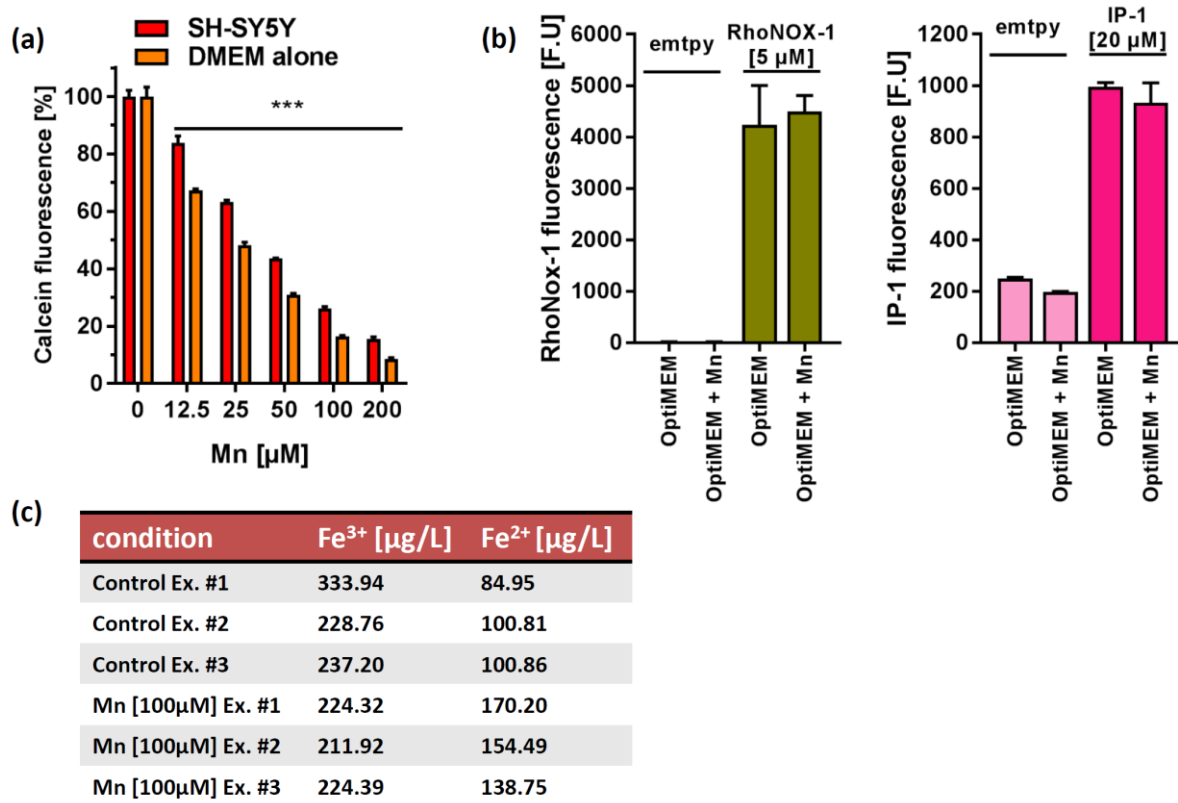

**Supplemental Fig. 3 (corresponding to Fig. 4):** (a) SH-SY5Y cells or complete DMEM media alone were incubated with increasing Mn doses for 24 h, loaded with calcein-AM and analyzed for fluorescence. Data are presented as relative fluorescence compared to untreated fluorescence (n=6). (b) Cell-free background fluorescence of OptiMEM media ± 100 μM Mn (empty) or OptiMEM media ± 100 μM Mn loaded with either 5 μM RhoNOX-1 (left panel) or 20 μM IP-1 (right panel). Data are presented as absolute fluorescence units (F.U.) (n=3). (c) Absolute Fe<sup>2+</sup> and Fe<sup>3+</sup> values assayed by IC-ICP-MS and CE-ICP-MS from SH-SY5Y lysates treated with DMEM media or 100 μM Mn. Corresponding relative Fe<sup>3+</sup> to total iron and Fe<sup>2+</sup> to total iron ratio are shown in Fig. 4b. Data are presented as mean ± SD. N number indicates number of replicates. Differences were calculated using either two-way ANOVA followed by Bonferroni post-hoc analyses. (\*, p < 0.05; \*\*, p < 0.01; \*\*\*, p < 0.001).

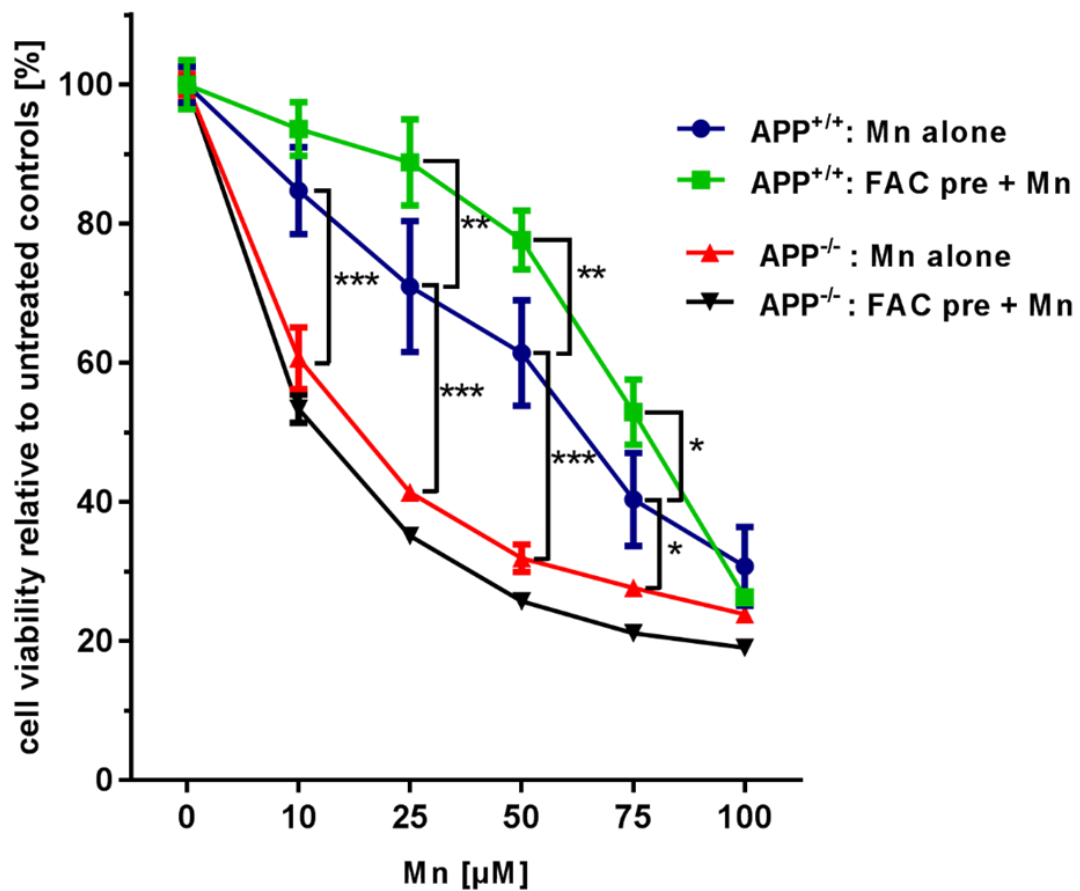

**Supplemental Fig. 4 (corresponding to Fig. 5):** Immortalized murine embryonal fibroblasts (MEFs) were isolated from wild-type mice (APP<sup>+/+</sup>) or APP-knockout (APP<sup>-/-</sup>) mice. APP<sup>+/+</sup> and APP<sup>-/-</sup> MEFs were either pretreated with 100 μM FAC or media for 24 h and subsequently incubated with increasing doses of Mn for additional 24 h and analyzed for cell viability (n=3). Data are presented as mean ± SD. N number indicates number of replicates. Differences were calculated using two-way ANOVA followed by Bonferroni post-hoc analyses. (\*, p < 0.05; \*\*, p < 0.01; \*\*\*, p < 0.001).

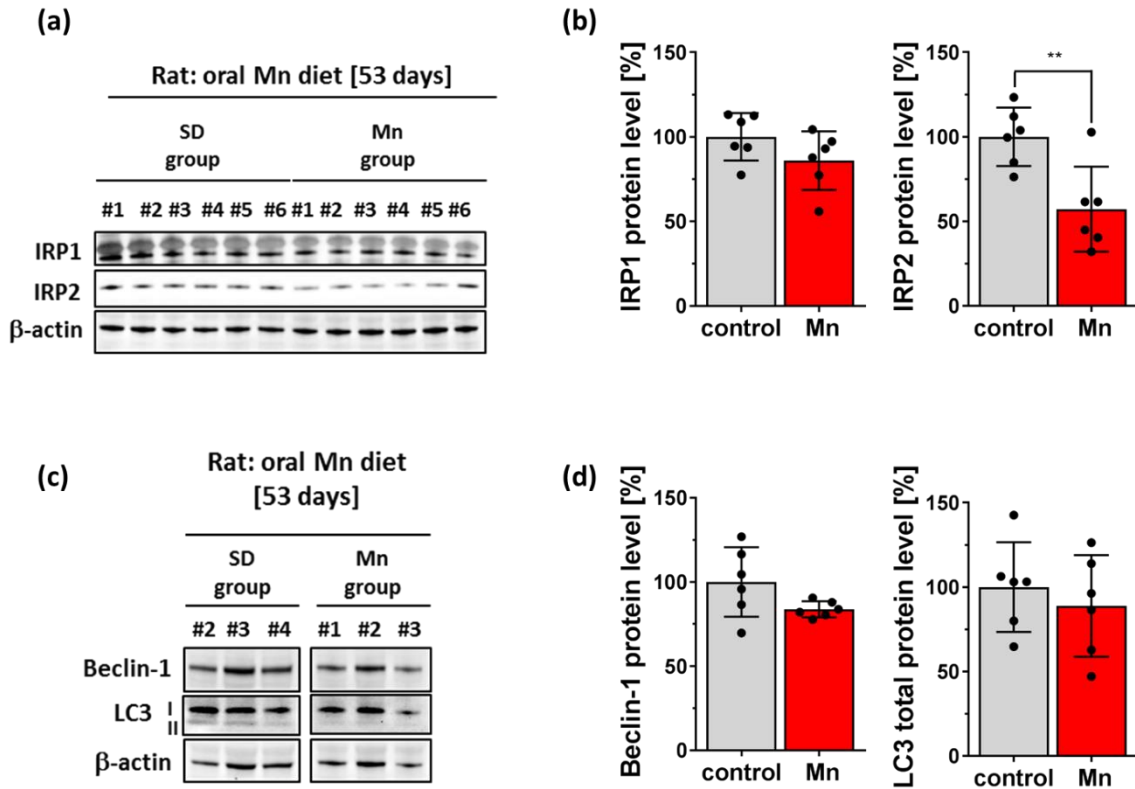

**Supplemental Fig. 5 (corresponding to Fig. 6):** Corresponding western blots of IRP1 and IRP2 from whole brains lysates of either Sprague-Dawley rats treated with standard diet (SD group) or Mn (500 mg/kg) for 53 days.  $\beta$ -actin served as loading control. **(b)** Densitometric quantifications were normalized to  $\beta$ -actin (each group: n=6). **(c)** Representative western blots of autophagy marker Beclin-1 and LC3.  $\beta$ -actin served as loading control. **(d)** Densitometric quantifications were normalized to  $\beta$ -actin (each group: n=6). N number indicates number of individual animals. Data are presented as mean  $\pm$  SD. Differences were calculated using unpaired t-test.
